# Supplementary material for: PE38-based gene therapy of HER2-positive breast cancer stem cells via VHH-redirected polyamidoamine dendrimers
Source: PubMed Central journal article supplement (PMC8324773; doi:10.1038/s41598-021-93972-5), 2021-07-30
Supplement: 41598_2021_93972_MOESM1_ESM.pdf [file 41598_2021_93972_MOESM1_ESM.pdf]

**PE38-based Gene Therapy of HER2-positive Breast Cancer Stem Cells via VHH-redirected Polyamidoamine Dendrimers**

Cobra Moradian and Fatemeh Rahbarizadeh\*

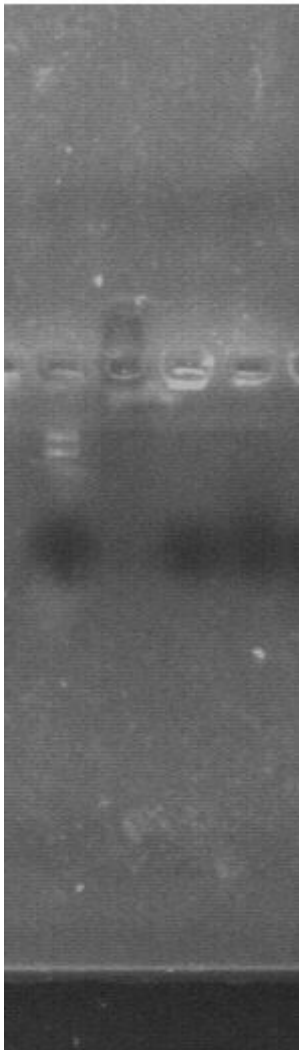

**Supplementary figure 1** Plasmid mobility retardation assay by 1% agarose gel
